# Supplementary material for: The Circadian Nobiletin-ROR Axis Suppresses Adipogenic Differentiation and IκBα/NF-κB Signaling in Adipocytes
Source: MDPI journal article supplement (doi:10.3390/nu15183919), 2023-09-09
Supplement: s1 [file s1]

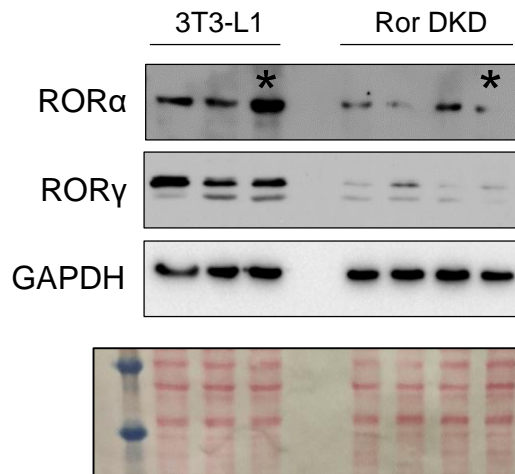

**Supplementary Figure S1. Ror DKD cells were generated by CRISPR.** Validation of RORα and RORγ protein expressions in Rorac KD cells. \* indicated the cell clones used for further experiments. Lower panel; Ponceau staining for the membrane used in Western blotting.

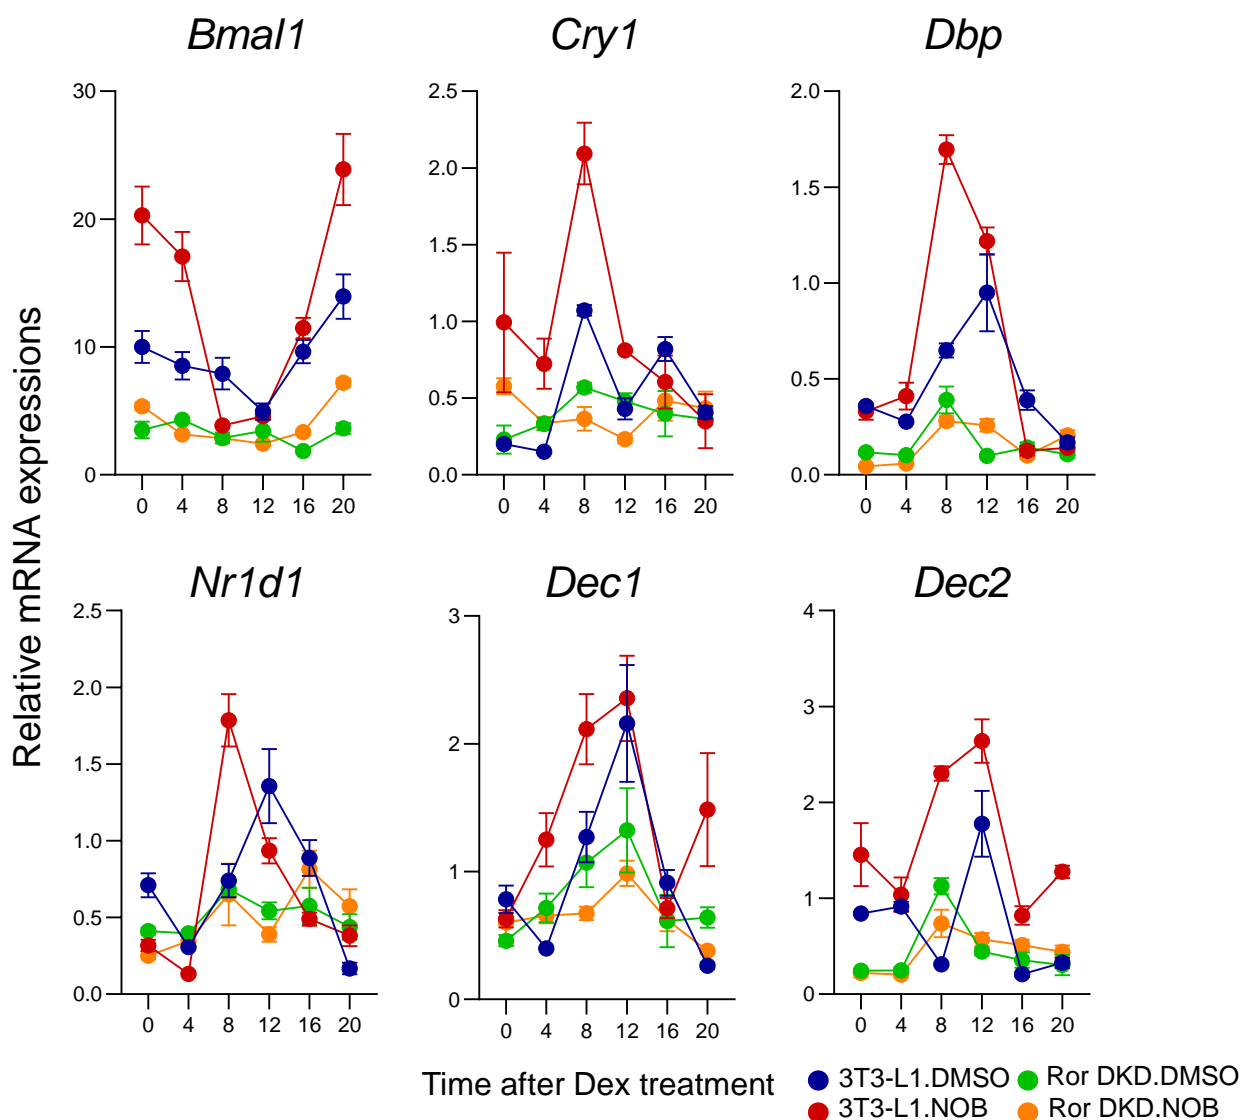

**Supplementary Figure S2. ROR-dependent circadian gene expression was enhanced by NOB.** A. Real-time qPCR analysis of core clock gene expressions of Ror DKD 3T3-L1 cells treated with NOB 20  $\mu$ M at 6 days after differentiation. Data are shown as mean  $\pm$  SEM every 4 h for 24 h ( $n=3$ /group/time point).

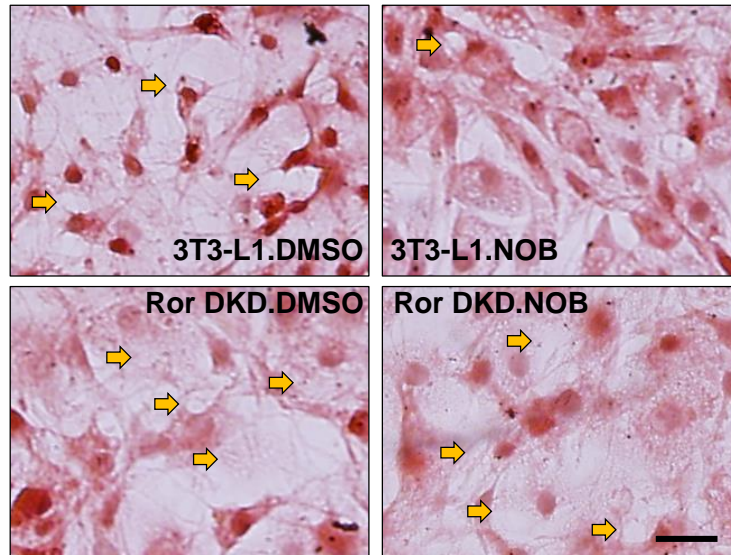

**Supplementary Figure S3. Ror DKD showed accumulation of lipid droplets.** Representative images of H&E staining of 3T3-L1 and Ror DKD cells treated with NOB 20  $\mu$ M at 6 days after differentiation. Yellow arrows indicate representative lipid droplets. Scale bar = 200  $\mu$ m ( $\times 10$ ).
